# Supplementary material
Source: PubMed Central journal article supplement (PMC3988452)
Supplement: supp_ddt626_ddt626supp.pdf [file supp_ddt626_ddt626supp.pdf]

## Supplementary Materials: Acknowledgements and Funding

### Acknowledgements

The CARE Consortium wishes to acknowledge the support of the National Heart, Lung, and Blood Institute and the contributions of the research institutions, study investigators, field staff and study participants in creating this resource for biomedical research [contract number HHSN268200960009C]. The following nine parent studies have contributed parent study data, ancillary study data, and DNA samples through the Massachusetts Institute of Technology - Broad Institute [N01-HC-65226] to create this genotype/phenotype database for wide dissemination to the biomedical research community: the Atherosclerosis Risk in Communities (ARIC) study, the Cardiovascular Health Study (CHS), the Cleveland Family Study (CFS), the Cooperative Study of Sickle Cell Disease (CSSCD), the Coronary Artery Risk Development in Young Adults (CARDIA) study, the Framingham Heart Study (FHS), the Jackson Heart Study (JHS), the Multi-Ethnic Study of Atherosclerosis (MESA), and the Sleep Heart Health Study (SHHS).

The Atherosclerosis Risk in Communities Study is carried out as a collaborative study supported by National Heart, Lung, and Blood Institute contracts [HHSN268201100005C, HHSN268201100006C, HHSN268201100007C, HHSN268201100008C, HHSN268201100009C, HHSN268201100010C, HHSN268201100011C, and HHSN268201100012C], [R01HL087641, R01HL59367 and R01HL086694]; National Human Genome Research Institute contract [U01HG004402]; and National Institutes of Health contract [HHSN268200625226C]. The authors thank the staff and participants of the ARIC study for their important contributions. Infrastructure was partly supported by Grant Number [UL1RR025005], a component of the National Institutes of Health and National Institutes of Health Roadmap for Medical Research.

CARDIA was funded by NHBLI contracts [N01-HC-95095; N01-HC-48047, N01-HC-48048, N01-HC-48049, and N01-HC-48050].

CHS was supported by contracts [HHSN268201200036C, HHSN268200800007C, N01 HC55222, N01HC85079, N01HC85080, N01HC85081, N01HC85082, N01HC85083, N01HC85086], and grant [HL080295] from the National Heart, Lung, and Blood Institute (NHLBI) with additional contribution from the National Institute of Neurological Disorders and Stroke (NINDS). Additional

support was provided by [AG023629] from the National Institute on Aging (NIA). A full list of principal CHS investigators and institutions can be found at CHS-National Heart, Lung, and Blood Institute.org.

MESA and the MESA SHARe project are conducted and supported by the National Heart, Lung, and Blood Institute in collaboration with MESA investigators. Support for MESA is provided by contracts [N01-HC-95159, N01-HC-95160, N01-HC-95161, N01-HC-95162, N01-HC-95163, N01-HC-95164, N01-HC-95165, N01-HC-95166, N01-HC-95167, N01-HC-95168, N01-HC-95169 and CTSaul1-RR-024156].

AMISH (Amish genetic studies of Lancaster County, PA, USA) - The Amish study was funded by the National Institutes of Health [U01 HL72515, U01 GM074518, R01 HL088119], with additional funding for CardioChip analysis provided by an American Heart Association Scientist Development grant [0830146N]. Genotyping of CardioChip was carried out in the Genomics Core at the University of Maryland, Baltimore with support from the Mid-Atlantic Nutrition and Obesity Research Center (National Institutes of Health [P30 DK072488]).

BHS (Bogalusa Heart Study) - Erin N. Smith, Sarah S. Murray, and Nicholas J. Schork are supported in part by National Institutes of Health/NCRR Grant Number [UL1 RR025774]. The BHS was supported by grants [HD-061437 and HD-062783] from the National Institute of Child Health and Human Development, and [AG-16592] from the National Institute on Aging.

BRIGHT (British Genetics of Hypertension) - BRIGHT (British Genetics of Hypertension) - The HumanCVD BeadChip genotyping for the BRIGHT cohort was funded by the British Heart Foundation [PG/07/131/24254], PI - Patricia B. Munroe. This work forms part of the research themes contributing to the translational research portfolio of the National Institute for Health Research Cardiovascular Biomedical Research Unit at Barts. The BRIGHT study is extremely grateful to all the patients who participated in the study and the BRIGHT nursing team and we would also like to thank Charles Mein, Richard Dobson, and the Barts Genome Centre staff. Anna F. Dominiczak is also supported by BHF grants [RG/07/005/23633 and SP/08/005/25115] and EU Ingenious HyperCare Consortium: Integrated Genomics, Clinical Research, and Care in Hypertension [LSHM-C7-2006-037093].

BWHHS (British Women's Heart and Health Study) - BWHHS is supported by funding from the British Heart Foundation and the Department of Health Policy Research Programme (England). We thank the BWHHS data collection team, General Practitioners who helped with recruitment of participants and the participants. We thank all of the participants and the general practitioners, research nurses and data management staff who supported data collection and preparation. The BWHHS is coordinated by Shah Ebrahim (PI), Debbie Lawlor and Juan-Pablo Casas, with genotyping funded by the BHF [PG/07/131/24254, PI Tom Gaunt]. The BRIGHT study was supported by the Medical Research Council of Great Britain [G9521010D] and the British Heart Foundation [PG/02/128].

EPIC-NL (European Prospective Investigation into Cancer and Nutrition in the Netherlands) - The EPIC-NL study was funded by 'Europe against Cancer' Programme of the European Commission (SANCO), Dutch Ministry of Public Health, Welfare and Sports (VWS), Netherlands Cancer Registry (NKR), LK Research Funds, Dutch Prevention Funds, Dutch Cancer Society; ZonMW the Netherlands Organisation for Health Research and Development, World Cancer Research Fund (WCRF) (The Netherlands). Genotyping was funded by IOP Genomics grant [IGE05012] from Agentschap NL.

GRAPHIC (Genetic Regulation of Arterial Pressure of Humans in the Community) - The GRAPHIC Study was funded by the British Heart Foundation and is part of the research portfolio supported by the Leicester National Institutes of Health Biomedical Research Unit in Cardiovascular Disease. Martin D. Tobin holds a Medical Research Council (MRC) Clinician Scientist Fellowship [G0501942]. Nilesh J. Samani holds a personal chair supported by the British Heart Foundation.

KORA (Cooperative Health Research in the Region of Augsburg Study) - The MONICA/KORA Augsburg studies were financed by the Helmholtz Zentrum München, German Research Center for Environmental Health, Neuherberg, Germany and supported by grants from the German Federal Ministry of Education and Research (BMBF). Part of this work was financed by the German National Genome Research Network [NGFNPlus, project number 01GS0834] and through additional funds from the University of Ulm. Furthermore, the research was supported within the Munich Center of Health Sciences (MC Health) as part of LMU innovative.

#### Look AHEAD Acknowledgements

The Look AHEAD (Action for Health in Diabetes) Research Group – A full listing of this group is published in the baseline paper (PMID 17160917).

#### Funding and Support for Look AHEAD

This study is supported by the Department of Health and Human Services through the following cooperative agreements

from the National Institutes of Health: [DK57136, DK57149, DK56990, DK57177, DK57171, DK57151, DK57182, DK57131, DK57002, DK57078, DK57154, DK57178, DK57219, DK57008, DK57135, and DK56992]. The following federal agencies have contributed support: National Institute of Diabetes and Digestive and Kidney Diseases; National Heart, Lung, and Blood Institute; National Institute of Nursing Research; National Center on Minority Health and Health Disparities; Office of Research on Women's Health; and the Centers for Disease Control and Prevention.

Additional support was received from The Johns Hopkins Medical Institutions Bayview General Clinical Research Center [M01RR02719]; the Massachusetts General Hospital Mallinckrodt General Clinical Research Center [M01RR01066]; the University of Colorado Health Sciences Center General Clinical Research Center [M01RR00051] and Clinical Nutrition Research Unit [P30 DK48520]; the University of Tennessee at Memphis General Clinical Research Center [M01RR0021140]; the University of Pittsburgh General Clinical Research Center [M01RR000056 44] and National Institutes of Health grants [DK 046204 and DK072497]; and the University of Washington / VA Puget Sound Health Care System Medical Research Service, Department of Veterans Affairs; Frederic C. Bartter General Clinical Research Center [M01RR01346], and [DK090043] to J.M.M.

The following organizations have committed to make major contributions to Look AHEAD: Federal Express; Health Management Resources; Johnson & Johnson, LifeScan Inc.; Optifast-Novartis Nutrition; Roche Pharmaceuticals; Ross Product Division of Abbott Laboratories; Slim-Fast Foods Company; and Unilever.

We acknowledge the Look AHEAD sites that participated in this ancillary study.

Johns Hopkins Medical Institutions Frederick L. Brancati, MD, MHS<sup>1</sup>; Jeff Honas, MS<sup>2</sup>; Lawrence Cheskin, MD<sup>3</sup>; Jeanne M. Clark, MD, MPH<sup>3</sup>; Kerry Stewart, EdD<sup>3</sup>; Richard Rubin, PhD<sup>3</sup>; Jeanne Charleston, RN; Kathy Horak, RD

Pennington Biomedical Research Center George A. Bray, MD<sup>1</sup>; Kristi Rau<sup>2</sup>; Allison Strate, RN<sup>2</sup>; Brandi Armand, LPN<sup>2</sup>; Frank L. Greenway, MD<sup>3</sup>; Donna H. Ryan, MD<sup>3</sup>; Donald Williamson, PhD<sup>3</sup>; Amy Bachand; Michelle Begnaud; Betsy Berhard; Elizabeth Caderette; Barbara Cerniauskas; David Creel; Diane Crow; Helen Guay; Nancy Kora; Kelly LaFleur; Kim Landry; Missy Lingle; Jennifer Perault; Mandy Shipp, RD; Marisa Smith; Elizabeth Tucker

University of Alabama at Birmingham Cora E. Lewis, MD, MSPH<sup>1</sup>; Sheikilya Thomas MPH<sup>2</sup>; Monika Safford, MD<sup>3</sup>; Vicki DiLillo, PhD; Charlotte Bragg, MS, RD, LD; Amy Dobelstein; Stacey Gilbert, MPH; Stephen Glasser, MD; Sara Hannum, MA; Anne Hubbell, MS; Jennifer Jones, MA; DeLavallade Lee; Ruth Luketic, MA, MBA, MPH; Karen Marshall; L. Christie Oden; Janet

Raines, MS; Cathy Roche, RN, BSN; Janet Truman; Nita Webb, MA; Audrey Wrenn, MAEd

Harvard Center

*Massachusetts General Hospital:* David M. Nathan, MD<sup>1</sup>; Heather Turgeon, RN, BS, CDE<sup>2</sup>; Kristina Schumann, BA<sup>2</sup>; Enrico Cagliero, MD<sup>3</sup>; Linda Delahanty, MS, RD<sup>3</sup>; Kathryn Hayward, MD<sup>3</sup>; Ellen Anderson, MS, RD<sup>3</sup>; Laurie Bissett, MS, RD; Richard Ginsburg, PhD; Valerie Goldman, MS, RD; Virginia Harlan, MSW; Charles McKittrick, RN, BSN, CDE; Alan McNamara, BS; Theresa Michel, DPT, DSc CCS; Alexi Poulos, BA; Barbara Steiner, EdM; Joclyn Tosch, BA

*Joslin Diabetes Center:* Edward S. Horton, MD<sup>1</sup>; Sharon D. Jackson, MS, RD, CDE<sup>2</sup>; Osama Hamdy, MD, PhD<sup>3</sup>; A. Enrique Caballero, MD<sup>3</sup>; Sarah Bain, BS;

Elizabeth Bovaird, BSN, RN; Ann Goebel-Fabbri, PhD; Lori Lambert, MS, RD;

Sarah Ledbury, MEd, RD; Maureen Malloy, BS; Kerry Ovalle, MS, RCEP, CDE

*Beth Israel Deaconess Medical Center:* George Blackburn, MD, PhD<sup>1</sup>; Christos Mantzoros, MD, DSc<sup>3</sup>; Kristinia Day, RD; Ann McNamara, RN

University of Colorado Health Sciences Center James O. Hill, PhD<sup>1</sup>; Marsha Miller, MS, RD<sup>2</sup>; JoAnn Phillipp, MS<sup>2</sup>; Robert Schwartz, MD<sup>3</sup>; Brent Van Dorsten, PhD<sup>3</sup>; Judith Regensteiner, PhD<sup>3</sup>; Salma Benchekroun MS; Ligia Coelho, BS;

Paulette Cohrs, RN, BSN; Elizabeth Daeninck, MS, RD; Amy Fields, MPH; Susan Green; April Hamilton, BS, CCRC; Jere Hamilton, BA; Eugene Leshchinskiy; Michael McDermott, MD; Lindsey Munkwitz, BS; Loretta Rome, TRS; Kristin Wallace, MPH; Terra Worley, BA

Baylor College of Medicine John P. Foreyt, PhD<sup>1</sup>; Rebecca S. Reeves, DrPH, RD<sup>2</sup>; Henry Pownall, PhD<sup>3</sup>; Ashok Balasubramanyam, MBBS<sup>3</sup>; Peter Jones, MD<sup>3</sup>; Michele Burrington, RD; Chu-Huang Chen, MD, PhD; Allyson Clark, RD; Molly Gee, MEd, RD; Sharon Griggs; Michelle Hamilton; Veronica Holley; Jayne Joseph, RD; Patricia Pace, RD; Julieta Palencia, RN; Olga Satterwhite, RD;

Jennifer Schmidt; Devin Volding, LMSW; Carolyn White

University of Tennessee Health Science Center

*University of Tennessee East.* Karen C. Johnson, MD, MPH<sup>1</sup>; Carolyn Gresham, RN<sup>2</sup>; Stephanie Connelly, MD, MPH<sup>3</sup>; Amy

Brewer, RD, MS; Mace Coday, PhD; Lisa Jones, RN; Lynne Lichtermann, RN, BSN; Shirley Vosburg, RD, MPH; and J. Lee Taylor, MEd, MBA

University of Tennessee Downtown. Abbas E. Kitabchi, PhD, MD<sup>1</sup>; Helen Lambeth, RN, BSN<sup>2</sup>; Debra Clark, LPN; Andrea Crisler, MT; Gracie Cunningham; Donna Green, RN; Debra Force, MS, RD, LDN; Robert Kores, PhD; Renate Rosenthal PhD; Elizabeth Smith, MS, RD, LDN; and Maria Sun, MS, RD, LDN; and Judith Soberman, MD<sup>3</sup>

University of Minnesota Robert W. Jeffery, PhD<sup>1</sup>; Carolyn Thorson, CCRP<sup>2</sup>; John P. Bantle, MD<sup>3</sup>; J. Bruce Redmon, MD<sup>3</sup>; Richard S. Crow, MD<sup>3</sup>; Scott Crow, MD<sup>3</sup>; Susan K Raatz, PhD, RD<sup>3</sup>; Kerrin Brelje, MPH, RD; Carlyne Campbell;

Jeanne Carls, MEd; Tara Carmean-Mihm, BA; Emily Finch, MA; Anna Fox, MA;

Elizabeth Hoelscher, MPH, RD, CHES; La Donna James; Vicki A. Maddy, BS, RD; Therese Ockenden, RN; Birgitta I. Rice, MS, RPh CHES; Tricia Skarphol, BS; Ann D. Tucker, BA; Mary Susan Voeller, BA; Cara Walcheck, BS, RD

St. Luke's Roosevelt Hospital Center Xavier Pi-Sunyer, MD<sup>1</sup>; Jennifer Patricio, MS<sup>2</sup>; Stanley Heshka, PhD<sup>3</sup>; Carmen Pal, MD<sup>3</sup>; Lynn Allen, MD; Diane Hirsch, RNC, MS, CDE; Mary Anne Holowaty, MS, CN

University of Pennsylvania Thomas A. Wadden, PhD<sup>1</sup>; Barbara J. Maschak-Carey, MSN, CDE<sup>2</sup>; Stanley Schwartz, MD<sup>3</sup>; Gary D. Foster, PhD<sup>3</sup>; Robert I. Berkowitz, MD<sup>3</sup>; Henry Glick, PhD<sup>3</sup>; Shiriki K. Kumanyika, PhD, RD, MPH<sup>3</sup>; Johanna Brock; Helen Chomentowski; Vicki Clark; Canice Crerand, PhD; Renee Davenport; Andrea Diamond, MS, RD; Anthony Fabricatore, PhD; Louise Hesson, MSN; Stephanie Krauthamer-Ewing, MPH; Robert Kuehnel, PhD; Patricia Lipschutz, MSN; Monica Mullen, MS, RD; Leslie Womble, PhD, MS; Nayyar Iqbal, MD

University of Pittsburgh David E. Kelley, MD<sup>1</sup>; Jacqueline Wesche-Thobaben, RN, BSN, CDE<sup>2</sup>; Lewis Kuller, MD, DrPH<sup>3</sup>; Andrea Kriska, PhD<sup>3</sup>; Janet Bonk, RN, MPH; Rebecca Danchenko, BS; Daniel Edmundowicz, MD<sup>3</sup>; Mary L. Klem, PhD, MLIS<sup>3</sup>; Monica E. Yamamoto, DrPH, RD, FADA<sup>3</sup>; Barb Elnyczky, MA; George A. Grove, MS; Pat Harper, MS, RD, LDN; Janet Krulia, RN, BSN, CDE; Juliet Mancino, MS, RD, CDE, LDN; Anne Mathews, MS, RD, LDN; Tracey Y. Murray, BS; Joan R. Ritchea; Jennifer Rush, MPH; Karen Vujevich, RN-BC, MSN, CRNP; Donna Wolf, MS

Miriam Hospital/Brown Medical School Rena R. Wing, PhD<sup>1</sup>; Renee Bright, MS<sup>2</sup>; Vincent Pera, MD<sup>3</sup>; John Jakicic, PhD<sup>3</sup>; Deborah Tate, PhD<sup>3</sup>; Amy Gorin, PhD<sup>3</sup>; Kara Gallagher, PhD<sup>3</sup>; Amy Bach, PhD; Barbara Bancroft, RN, MS; Anna Bertorelli, MBA, RD; Richard Carey, BS; Tatum Charron, BS; Heather Chenot, MS; Kimberley Chula-Maguire, MS; Pamela Coward, MS, RD; Lisa

Cronkite, BS; Julie Currin, MD; Maureen Daly, RN; Caitlin Egan, MS; Erica Ferguson, BS, RD; Linda Foss, MPH; Jennifer Gauvin, BS; Don Kieffer, PhD; Lauren Lessard, BS; Deborah Maier, MS; JP Massaro, BS; Tammy Monk, MS; Rob Nicholson, PhD; Erin Patterson, BS; Suzanne Phelan, PhD; Hollie Raynor, PhD, RD; Douglas Raynor, PhD; Natalie Robinson, MS, RD; Deborah Robles; Jane Tavares, BS

University of Texas Health Science Center at San Antonio Steven M. Haffner, MD<sup>1</sup>; Maria G. Montez, RN, MSHP, CDE<sup>2</sup>; Carlos Lorenzo, MD<sup>3</sup>

University of Washington / VA Puget Sound Health Care System Steven Kahn MB, ChB<sup>1</sup>; Brenda Montgomery, RN, MS, CDE<sup>2</sup>; Robert Knopp, MD<sup>3</sup>; Edward Lipkin, MD<sup>3</sup>; Matthew L. Maciejewski, PhD<sup>3</sup>; Dace Trence, MD<sup>3</sup>; Terry Barrett, BS; Joli Bartell, BA; Diane Greenberg, PhD; Anne Murillo, BS; Betty Ann Richmond, MEd; April Thomas, MPH, RD

Coordinating Center, Wake Forest University Mark A. Espeland, PhD<sup>1</sup>; Judy L. Bahnson, BA<sup>2</sup>; Lynne Wagenknecht, DrPH<sup>3</sup>; David Reboussin, PhD<sup>3</sup>; W. Jack Rejeski, PhD<sup>3</sup>; Alain Bertoni, MD, MPH<sup>3</sup>; Wei Lang, PhD<sup>3</sup>; Gary Miller, PhD<sup>3</sup>; David Lefkowitz, MD<sup>3</sup>; Patrick S. Reynolds, MD<sup>3</sup>; Paul Ribisl, PhD<sup>3</sup>; Mara Vitolins, DrPH<sup>3</sup>; Michael Booth, MBA<sup>2</sup>; Kathy M. Dotson, BA<sup>2</sup>; Amelia Hodges, BS<sup>2</sup>; Carrie C. Williams, BS<sup>2</sup>; Jerry M. Barnes, MA; Patricia A. Feeney, MS; Jason Griffin, BS; Lea Harvin, BS; William Herman, MD, MPH; Patricia Hogan, MS; Sarah Jaramillo, MS; Mark King, BS; Kathy Lane, BS; Rebecca Neiberg, MS; Andrea Ruggiero, MS; Christian Speas, BS; Michael P. Walkup, MS; Karen Wall, AAS; Michelle Ward; Delia S. West, PhD; Terri Windham

Central Laboratory, Northwest Lipid Research Laboratories Santica M. Marcovina, PhD, ScD<sup>1</sup>; Greg Strylewicz, MS

#### Federal Sponsors for Look AHEAD

National Institute of Diabetes and Digestive and Kidney Diseases: Barbara Harrison, MS; Van S. Hubbard, MD PhD; Susan Z. Yanovski, MD

National Heart, Lung, and Blood Institute: Lawton S. Cooper, MD, MPH; Jeffrey Cutler, MD, MPH; Eva Obarzanek, PhD, MPH, RD

Centers for Disease Control and Prevention: Edward W. Gregg, PhD; David F. Williamson, PhD; Ping Zhang, PhD

---

<sup>1</sup> Principal Investigator

<sup>2</sup> Program Coordinator

<sup>3</sup> Co-Investigator

All other Look AHEAD staffs are listed alphabetically by site.

MDC (Malmo Diet and Cancer) - MDC cohort was funded by the British Heart Foundation [PG/07/131/24254], PI - Patricia B. Munroe).

NSHS95 (Nova Scotia Health Survey 1995) - NSHS95 was supported by grants by [HL-091099, HL-080665, HL-076857, HL-084034, HL-088117, HL-07854, and HL-072866] from the National Heart, Lung, and Blood Institute; by the National Health and Welfare of Canada, Ottawa, Ontario; by the Nova Scotia Department of Health, Halifax; and by the Heart and Stroke Foundation of New Brunswick, Saint John. Dr. Shaffer's role in this project was supported research grants from the American Heart Association [12CRP8870004] and the National Heart, Lung, and Blood Institute of the National Institutes of Health [K23-HL112850].

PEAR (Pharmacogenomics Evaluation of Antihypertensive Responses) - the study was supported by the National Institute of Health Pharmacogenetics Research Network grant [U01-GM074492] and the National Center for Advancing Translational Sciences under the award number [UL1 TR000064] (University of Florida); [UL1 TR000454] (Emory University) and [UL1 TR000135] (Mayo Clinic). PEAR was also supported by funds from the Mayo Foundation. INVEST and PEAR studies thank the participants that made this collection possible. We also acknowledge and thank the PEAR support staff, and study physicians: Drs. George Baramidze, R. Whit Curry, Karen Hall, Frederic Rabari-Oskoui, Dan Rubin, and Siegfried Schmidt.

PennCAC (University of Pennsylvania Coronary Artery Calcification Study) - PennCAC gratefully acknowledge the participation of the study subject and are indebted to the investigators on these teams.

SHARE (Study of Health and Atherosclerosis risk in multiple Ethnicities) - The SHARE study was funded by Canadian Institutes of Health Research (CIHR) [MOP-13430, MOP-79523, CTP-79853], the Heart and Stroke Foundation of Ontario [NA-6059, T-6018, PRG-4854], Genome Canada through Ontario Genomics Institute and the Pfizer Jean Davignon Distinguished Cardiovascular and Metabolic Research Award.

WHI (Women's Health Initiative) - The WHI program is funded by the National Heart, Lung, and Blood Institute, National Institutes of Health, U.S. Department of Health and Human Services through contracts [N01WH22110, 24152, 32100-2, 32105-6, 32108-9, 32111-13, 32115, 32118-32119, 32122, 42107-26, 42129-32, and 44221]. The WHI program is funded by the National Heart, Lung, and Blood Institute, National Institutes of Health, U.S. Department of Health and Human Services through contracts [HHSN268201100046C, HHSN268201100001C, HHSN268201100002C, HHSN268201100003C, HHSN268201100004C, and



HHSN271201100004C].

Michael Barnes was funded by the National Institutes for Health Research (NIHR) as part of the portfolio of translational research of the NIHR Biomedical Research Unit at Barts.
